# Supplementary material for: Assessment of Knowledge, attitudes and practices concerning travel health among Hajj pilgrims (1439 H- 2018 G) at Prince Mohammad bin Abdulaziz International Airport in AL-Madina, Saudi Arabia
Source: Research Square preprint supplement (doi:10.21203/rs.3.rs-254699/v1), 2021-03-01
Supplement: Supplementary file 1 [file ad53bc1bba1db139743283e4.docx]

**Data collection tool**

| **Demographic** | | | | |  |
| --- | --- | --- | --- | --- | --- |
| **Nationality** | Saudi | Non-Saudi | **Specify** |  |  |
| **Residence** | Saudi Arabia(domestic pilgrims) | Others (foreign pilgrims) |  |  |  |
| **Age** | <30 | 30-50 | >50 |  |  |
| **Sex** | Male | Female |  |  |  |
| **Completed highest level of education** | Illiterate | Primary | Preparatory | Secondary | University and high |
| **Job (work status)** | Employed(working) | Un-employed (not- working) |  |  |  |
| **Marital status** | Single | Married | Divorced | Widowed |  |
| **Number of times attending Hajj** | First | 2-5 | 6-10 | >10 |  |
| **Length of current hajj stay** | <1 week | 1w-2w | >2w |  |  |

| **Knowledge** | | |
| --- | --- | --- |
| **Recommended hajj vaccination***  Meningitis  Poliomyelitis  Yellow fever  Influenza | Yes | No |
| **Recommended preventive measure against Middle Eastern Respiratory Syndrome Corona Virus (MERS-CoV) and other respiratory infections***  -Wash hands with soap and water or a disinfectant, especially after coughing and sneezing  **-** Use disposable tissues when coughing or sneezing  **-** Wear regular masks when in crowded places.  **-** Avoid close contact with people who appear ill and avoid sharing their personal belongings.  -Avoid contact with camels in farms, markets, or barn.  **-**Avoid drinking raw milk or eating meat that has not been thoroughly cooked | Yes | No |
| **Recommended preventive measures against insects bite (Zika Virus Disease and Dengue Fever )***  Insect repellents  Arms & legs cover  sleeping in air-conditioned rooms/tents | Yes | No |
| **Recommended preventive measures against Food and Water-Borne Diseases*:**  - Wash hands before and after eating and after going to the toilet.  - Thoroughly clean and wash fresh vegetables and fruit.  -Avoid eating improperly stored food. | Yes | No |
| **Recommended preventive measures against Heat-Related Conditions*:**  - All pilgrims, especially older individuals, should avoid direct sun exposure while performing rituals  - To drink sufficient amount of fluids.  - Health-related illness to their pilgrims.  -Medications that can exacerbate dehydration (e.g. diuretics) or interfere with heat exchange may need adjustment by treating physicians. | Yes | No |
| **Injury prevention measures*:**  -Expect overcrowding at religious sites and be alert to possible safety risks.  - To avoid peak times. | Yes | No |

* Categories are not mutually exclusive.

| **Attitude** | | | |
| --- | --- | --- | --- |
|  | Disagree | Uncertain | Agree |
| I think that travel does not increase disease risk if I am in good health |  |  |  |
| In my opinion visiting doctor before hajj travel is essential |  |  |  |
| I think that vaccines are very important before hajj travel |  |  |  |
| If I travel for hajj frequently, I do not need preventive measures much |  |  |  |
| In my opinion, personal hygiene protects from many diseases |  |  |  |
| I do not think that infectious diseases could be related to traveling to hajj |  |  |  |
| I think that gastro-enteritis only affects children and elderly |  |  |  |

| **Health seeking behavior (practice)** | | | | |
| --- | --- | --- | --- | --- |
| **Before hajj travel :** |  |  |  |  |
| **Travel preparation time** | <2w | 2-4w | >4w |  |
| **Seeking general information about Makka& hajj** | Yes | No |  |  |
| **Source of information about Makka& hajj *:**  Internet  Travel agent  Travel book  Friends or relatives | Yes | No |  |  |
| **Did you seek travel health or medical advice prior to departure?** | Yes | No |  |  |
| **If you did not seek medical advice prior to travel: Why not?** *  Too busy  No medical concerns  Didn’t know where to find information  Costs too much  I already knew the necessary information  Other: Specify |  |  |  |  |
| **If yes, When did you get the pre-travel advice?** | >4w | 2-4w | <2w |  |
| **Source of health advice***  Governmental health facility  Private health facility  Internet (eg. Saudi Arabia Country Information page- KSA Ministry of Health website..).  Mass media (TV. Radio..) | Yes | No |  |  |
| **Pre-travel preventive measures***  Vaccine(s)  Antimicrobial  Over the counter medications | Yes | No |  |  |
| **Pilgrims with preexisting medical conditions :***  **-**Consulted doctor for hajj suitability.  -If on prescribed medications, they have a sufficient supply to cover their time abroad with some extra in case of delays  - Carry a copy of their prescription**.** | Yes | No |  |  |
| **Ensure they have adequate Comprehensive travel insurance** | Yes | No |  |  |
| **A first aid kit to help them manage common issues such as cuts and grazes, headaches and travellers’ diarrhoea** | Yes | No |  |  |
| **During travel:** |  |  |  |  |
| If you became ill, you sought medical advice? | Yes | No |  |  |
| Take prophylactic or curative medications (e.g. antimicrobial ) as ordered by doctor | Yes | No |  |  |
| **Use preventive measure against respiratory infections***  -Wash hands with soap and water or a disinfectant, especially after coughing and sneezing  **-** Use disposable tissues when coughing or sneezing  **-** Wear regular masks when in crowded places.  **-** Avoid close contact with people who appear ill and avoid sharing their personal belongings.  -Avoid contact with camels in farms, markets, or barn.  **-**Avoid drinking raw milk or eating meat that has not been thoroughly cooked | Yes | No |  |  |
| **Use protective measures against insects ***  Insect repellents  Arms & legs cover  sleeping in air-conditioned rooms/tents | Yes | No |  |  |
| **Use preventive measures against Food and Water-Borne Diseases:***  **-**Wash hands before and after eating and after going to the toilet.  - Thoroughly clean and wash fresh vegetables and fruit.  -Avoid eating improperly stored food. | Yes | No |  |  |
| **Use preventive measures against Heat-Related Conditions*:**  - Avoid direct sun exposure while performing rituals  - Drink sufficient amount of fluids. | Yes | No |  |  |
| **Use** **Injury prevention measures***  -Avoid overcrowding at religious sites.  - Avoid peak times. | Yes | No |  |  |

* Categories are not mutually exclusive.
